# Supplementary material for: Swertia cincta Burkill alleviates LPS/D-GalN-induced acute liver failure by modulating apoptosis and oxidative stress signaling pathways
Source: publisher site journal article supplement (doi:10.18632/aging.204848), 2023-06-27
Supplement: Supplementary file [file aging-v15i12-204848-supplementary-material-SD3.pdf]

## SUPPLEMENTARY TABLES

**Supplementary Table 1. The ESC freeze-dry powder qualitative analysis results.**

| No. | RT(min) | Identification                                                               | Observed( <i>m/z</i> ) | Adduct              | Diff.(ppm) | Formula   | Chemical class                |
|-----|---------|------------------------------------------------------------------------------|------------------------|---------------------|------------|-----------|-------------------------------|
| 1   | 2.67    | Geniposidic acid                                                             | 373.1127               | [M-H]               | 3.45       | C16H22O10 | Iridoids                      |
| 2   | 2.78    | Gentisic acid                                                                | 153.0194               | [M-H]               | 2.87       | C7H6O4    | Xanthones                     |
| 3   | 2.83    | loganic acid                                                                 | 375.1301               | [M-H]-              | 2.97       | C16H24O10 | Organic acids and derivatives |
| 4   | 3.49    | Asperulosidic acid                                                           | 431.1186               | [M-H]               | 0.94       | C18H24O12 | Iridoids                      |
| 5   | 3.51    | Swertiamarin                                                                 | 419.1189               | [M+HCOO]            | 0.17       | C16H22O10 | Iridoids                      |
| 6   | 4.09    | Gentianine                                                                   | 176.0704               | [M+H] <sup>+</sup>  | 2.08       | C10H9NO2  | Alkaloids                     |
| 7   | 4.25    | Isomangiferin                                                                | 421.0775               | [M-H]               | 1.14       | C19H18O11 | Xanthones                     |
| 8   | 4.41    | Sweroside                                                                    | 403.1243               | [M+HCOO]            | 0.80       | C16H22O9  | Terpenoids                    |
| 9   | 4.96    | 4-Methylumbelliferone                                                        | 175.0399               | [M-H]               | 0.75       | C10H8O3   | Coumarins and derivatives     |
| 10  | 4.98    | Homoorientin                                                                 | 447.0921               | [M-H]               | 1.96       | C21H20O11 | Flavonoids                    |
| 11  | 5.05    | Gentiopicroside                                                              | 357.1170               | [M+H] <sup>+</sup>  | 0.03       | C16H20O9  | Iridoids                      |
| 12  | 5.57    | Rutin                                                                        | 611.1586               | [M+H] <sup>+</sup>  | 2.34       | C27H30O16 | Flavonoids                    |
| 13  | 5.62    | Isovitexin                                                                   | 431.0990               | [M-H]               | 2.38       | C21H20O10 | Flavonoids                    |
| 14  | 5.63    | Apigenin-8-C-glucoside                                                       | 433.1127               | [M+H] <sup>+</sup>  | 0.68       | C21H20O10 | Flavonoids                    |
| 15  | 5.66    | Hyperoside                                                                   | 465.1029               | [M+H]               | 2.02       | C21H20O12 | Flavonoids                    |
| 16  | 5.89    | Verbenalin                                                                   | 433.1342               | [M+HCOO]            | 1.96       | C17H24O10 | Iridoids                      |
| 17  | 6.06    | kaempferol 7-neohesperidoside                                                | 595.1669               | [M+H] <sup>+</sup>  | 1.59       | C27H30O15 | Flavonoids                    |
| 18  | 6.56    | 4-Methoxysalicylic acid                                                      | 167.0349               | [M-H]               | 0.40       | C8H8O4    | Phenols                       |
| 19  | 6.65    | Luteolin-4'-O-glucoside                                                      | 447.0932               | [M-H]-              | 0.51       | C21H20O11 | Flavonoids                    |
| 20  | 6.66    | Isoorientin                                                                  | 449.1073               | [M+H] <sup>+</sup>  | 1.61       | C21H20O11 | Flavonoids                    |
| 21  | 6.72    | 3-hydroxy-4-methoxyxanthone                                                  | 243.0650               | [M+H] <sup>+</sup>  | 0.20       | C14H10O4  | Miscellaneous                 |
| 22  | 6.78    | (2R,3R)-3,5-dihydroxy-2-(4-hydroxyphenyl)-7-methoxy-2,3-dihydrochromen-4-one | 303.0865               | [M+H] <sup>+</sup>  | 1.57       | C16H14O6  | Flavonoids                    |
| 23  | 6.92    | Iridin                                                                       | 521.1293               | [M-H]               | 1.37       | C24H26O13 | Flavonoids                    |
| 24  | 7.09    | Amarogentin                                                                  | 587.1769               | [M+H]               | 1.49       | C29H30O13 | Iridoids                      |
| 25  | 7.15    | Dihydrokaempferol                                                            | 289.0702               | [M+H] <sup>+</sup>  | 0.81       | C15H12O6  | Flavonoids                    |
| 26  | 7.79    | Syringaresinol                                                               | 419.1708               | [M+H] <sup>+</sup>  | 1.99       | C22H26O8  | Phenylpropanoids              |
| 27  | 8.41    | (3-hydroxyphenyl)-(2,4,6-trihydroxyphenyl)methanone                          | 247.0598               | [M+H] <sup>+</sup>  | 0.82       | C13H10O5  | Miscellaneous                 |
| 28  | 8.45    | Luteolin                                                                     | 287.0554               | [M+H]               | 1.38       | C15H10O6  | Flavonoids                    |
|     | 8.53    | Kaempferide                                                                  | 301.0708               | [M+H] <sup>+</sup>  | 0.56       | C16H12O6  | Flavonoids                    |
| 29  | 8.97    | 1,5,8-trihydroxy-3-methoxyxanthone                                           | 275.0546               | [M+H] <sup>+</sup>  | 1.38       | C14H10O6  | Miscellaneous                 |
| 30  | 9.84    | Tetrahydroxyxanthone                                                         | 259.0252               | [M-H]               | 0.94       | C13H8O6   | Flavonoids                    |
| 31  | 9.84    | (2S,3S)-2-(3,4-dihydroxyphenyl)-3,7-dihydroxy-2,3-dihydrochromen-4-one       | 289.0704               | [M+H] <sup>+</sup>  | 1.46       | C15H12O6  | Flavonoids                    |
| 32  | 10.24   | trifolirhizin                                                                | 469.1120               | [M+Na] <sup>+</sup> | 0.02       | C22H22O10 | Isoflavonoids                 |
| 33  | 10.44   | Oleanonic acid                                                               | 455.3511               | [M+H]               | 2.03       | C30H46O3  | Terpenoids                    |
| 34  | 10.51   | Eriodictyol                                                                  | 289.0704               | [M+H]               | 1.25       | C15H12O6  | Flavonoids                    |
| 35  | 11.27   | Maslinic acid                                                                | 473.3626               | [M+H] <sup>+</sup>  | 0.82       | C30H48O4  | Terpenoids                    |
| 36  | 12.06   | Kaempferol                                                                   | 285.0402               | [M-H]-              | 0.64       | C15H10O6  | Flavonoids                    |
| 37  | 14.87   | Oleanolic acid                                                               | 455.3527               | [M-H]-              | 0.74       | C30H48O3  | Terpenoids                    |
| 38  | 16.05   | Genistein                                                                    | 269.0455               | [M-H]               | 2.01       | C15H10O5  | Flavonoids                    |
| 39  | 16.81   | 3-Epilupeol                                                                  | 427.3941               | [M+H] <sup>+</sup>  | 0.13       | C30H50O   | Terpenoids                    |
| 40  | 18.00   | Betulinic acid                                                               | 455.3527               | [M-H]-              | 0.61       | C30H48O3  | Terpenoids                    |
| 41  | 21.63   | Ursolic acid                                                                 | 439.3562               | [M+H-H2O]-          | 1.81       | C30H48O3  | Terpenoids                    |

**Supplementary Table 2. The targets in ESC for ALF treatment.**

| <b>Number</b> | <b>Gene ID</b> | <b>Protein description</b>                                             | <b>Gene symbol</b> |
|---------------|----------------|------------------------------------------------------------------------|--------------------|
| 1             | 2147           | coagulation factor II                                                  | F2                 |
| 2             | 213            | albumin                                                                | ALB                |
| 3             | 4233           | MET proto-oncogene, receptor tyrosine kinase                           | MET                |
| 4             | 5788           | protein tyrosine phosphatase receptor type C                           | PTPRC              |
| 5             | 6554           | solute carrier family 10 member 1                                      | SLC10A1            |
| 6             | 975            | CD81 molecule                                                          | CD81               |
| 7             | 3717           | Janus kinase 2                                                         | JAK2               |
| 8             | 7297           | tyrosine kinase 2                                                      | TYK2               |
| 9             | 5468           | peroxisome proliferator activated receptor gamma                       | PPARG              |
| 10            | 3558           | interleukin 2                                                          | IL2                |
| 11            | 3643           | insulin receptor                                                       | INSR               |
| 12            | 1956           | epidermal growth factor receptor                                       | EGFR               |
| 13            | 7422           | vascular endothelial growth factor A                                   | VEGFA              |
| 14            | 6772           | signal transducer and activator of transcription 1                     | STAT1              |
| 15            | 2322           | fms related receptor tyrosine kinase 3                                 | FLT3               |
| 16            | 7015           | telomerase reverse transcriptase                                       | TERT               |
| 17            | 3815           | KIT proto-oncogene, receptor tyrosine kinase                           | KIT                |
| 18            | 5290           | phosphatidylinositol-4,5-bisphosphate 3-kinase catalytic subunit alpha | PIK3CA             |
| 19            | 25             | ABL proto-oncogene 1, non-receptor tyrosine kinase                     | ABL1               |
| 20            | 1557           | cytochrome P450 family 2 subfamily C member 19                         | CYP2C19            |
| 21            | 4353           | myeloperoxidase                                                        | MPO                |
| 22            | 5054           | serpin family E member 1                                               | SERPINE1           |
| 23            | 5243           | ATP binding cassette subfamily B member 1                              | ABCB1              |
| 24            | 20186          | nuclear receptor subfamily 1, group H, member 4                        | NR1H4              |
| 25            | 4318           | matrix metalloproteinase 9                                             | MMP9               |
| 26            | 18126          | nitric oxide synthase 2, inducible                                     | NOS2               |
| 27            | 1991           | elastase, neutrophil expressed                                         | ELANE              |
| 28            | 217            | aldehyde dehydrogenase 2 family member                                 | ALDH2              |
| 29            | 5781           | protein tyrosine phosphatase non-receptor type 11                      | PTPN11             |
| 30            | 2168           | fatty acid binding protein 1                                           | FABP1              |
| 31            | 596            | BCL2 apoptosis regulator                                               | BCL2               |
| 32            | 1080           | CF transmembrane conductance regulator                                 | CFTR               |
| 33            | 383            | arginase 1                                                             | ARG1               |
| 34            | 7276           | transthyretin                                                          | TTR                |
| 35            | 5836           | glycogen phosphorylase L                                               | PYGL               |
| 36            | 5747           | prostaglandin-endoperoxide synthase 2                                  | PTGS2              |
| 37            | 3716           | Janus kinase 1                                                         | JAK1               |
| 38            | 207            | AKT serine/threonine kinase 1                                          | AKT1               |
| 39            | 4193           | MDM2 proto-oncogene                                                    | MDM2               |
| 40            | 2321           | fms related receptor tyrosine kinase 1                                 | FLT1               |
| 41            | 3091           | hypoxia inducible factor 1 subunit alpha                               | HIF1A              |
| 42            | 3465           | peroxisome proliferator activated receptor alpha                       | PPARA              |
| 43            | 2539           | glucose-6-phosphate dehydrogenase                                      | G6PD               |
| 44            | 23411          | sirtuin 1                                                              | SIRT1              |
| 45            | 2475           | mechanistic target of rapamycin kinase                                 | MTOR               |
| 46            | 5327           | plasminogen activator, tissue type                                     | PLAT               |
| 47            | 5159           | platelet derived growth factor receptor beta                           | PDGFRB             |
| 48            | 2629           | glucosylceramidase beta 1                                              | GBA                |

|    |        |                                                 |          |
|----|--------|-------------------------------------------------|----------|
| 49 | 5340   | plasminogen                                     | PLG      |
| 50 | 4282   | macrophage migration inhibitory factor          | MIF      |
| 51 | 6403   | selectin P                                      | SELP     |
| 52 | 4311   | membrane metalloendopeptidase                   | MME      |
| 53 | 2260   | fibroblast growth factor receptor 1             | FGFR1    |
| 54 | 22259  | nuclear receptor subfamily 1, group H, member 3 | NR1H3    |
| 55 | 598    | BCL2 like 1                                     | BCL2L1   |
| 56 | 4363   | ATP binding cassette subfamily C member 1       | ABCC1    |
| 57 | 2099   | estrogen receptor 1                             | ESR1     |
| 58 | 3251   | hypoxanthine phosphoribosyltransferase 1        | HPRT1    |
| 59 | 7498   | xanthine dehydrogenase                          | XDH      |
| 60 | 100    | adenosine deaminase                             | ADA      |
| 61 | 3791   | kinase insert domain receptor                   | KDR      |
| 62 | 6850   | spleen associated tyrosine kinase               | SYK      |
| 63 | 673    | B-Raf proto-oncogene, serine/threonine kinase   | BRAF     |
| 64 | 4153   | myoglobin                                       | MB       |
| 65 | 116085 | solute carrier family 22 member 12              | SLC22A12 |
| 66 | 9429   | ATP binding cassette subfamily G member 2       | ABCG2    |
| 67 | 6555   | solute carrier family 10 member 2               | SLC10A2  |
| 68 | 5319   | phospholipase A2 group IB                       | PLA2G1B  |
| 69 | 2064   | erb-b2 receptor tyrosine kinase 2               | ERBB2    |
| 70 | 5604   | mitogen-activated protein kinase kinase 1       | MAP2K1   |
| 71 | 351    | amyloid beta precursor protein                  | APP      |
| 72 | 6469   | sonic hedgehog signaling molecule               | SHH      |

---

**Supplementary Table 3. The top 10 GO terms of BP, MF, and CC.**

| ONTOLOGY | ID         | Description                                                     | geneID                                                                                                                     | Count |
|----------|------------|-----------------------------------------------------------------|----------------------------------------------------------------------------------------------------------------------------|-------|
| BP       | GO:0018108 | peptidyl-tyrosine phosphorylation                               | MET/PTPRC/CD81/JAK2/TYK2/IL2/INSR/EGFR/VEGFA/FLT3/KIT/ABL1/PTPN11/JAK1/FLT1/MTOR/PDGFRB/MIF/FGFR1/KDR/SYK/ERBB2/MAP2K1/APP | 24    |
| BP       | GO:0018212 | peptidyl-tyrosine modification                                  | MET/PTPRC/CD81/JAK2/TYK2/IL2/INSR/EGFR/VEGFA/FLT3/KIT/ABL1/PTPN11/JAK1/FLT1/MTOR/PDGFRB/MIF/FGFR1/KDR/SYK/ERBB2/           | 24    |
| BP       | GO:0014065 | phosphatidylinositol 3-kinase signaling                         | F2/JAK2/INSR/EGFR/FLT3/KIT/PIK3CA/AKT1/FLT1/SIRT1/PDGFRB/SELP/FGFR1/KDR/ERBB2                                              | 15    |
| BP       | GO:0071902 | positive regulation of protein serine/threonine kinase activity | PTPRC/CD81/INSR/EGFR/VEGFA/FLT3/KIT/ELANE/PTPN11/AKT1/FLT1/SIRT1/PDGFRB/FGFR1/SYK/PLA2G1B/ERBB2/MAP2K1                     | 18    |
| BP       | GO:0043406 | positive regulation of MAP kinase activity                      | PTPRC/CD81/INSR/EGFR/VEGFA/FLT3/KIT/ELANE/PTPN11/FLT1/PDGFRB/FGFR1/SYK/PLA2G1B/ERBB2/MAP2K1                                | 16    |
| BP       | GO:0045834 | positive regulation of lipid metabolic process                  | F2/CD81/PPARG/FLT3/KIT/NR1H4/FABP1/PTGS2/AKT1/FLT1/PPARA/MTOR/PDGFRB/NR1H3                                                 | 14    |
| BP       | GO:0048015 | phosphatidylinositol-mediated signaling                         | F2/JAK2/INSR/EGFR/FLT3/KIT/PIK3CA/AKT1/FLT1/SIRT1/PDGFRB/SELP/FGFR1/KDR/ERBB2                                              | 15    |
| BP       | GO:0048017 | inositol lipid-mediated signaling                               | F2/JAK2/INSR/EGFR/FLT3/KIT/PIK3CA/AKT1/FLT1/SIRT1/PDGFRB/SELP/FGFR1/KDR/ERBB2                                              | 15    |
| BP       | GO:0014068 | positive regulation of phosphatidylinositol 3-kinase signaling  | F2/JAK2/INSR/FLT3/KIT/PIK3CA/FLT1/SIRT1/PDGFRB/SELP/FGFR1/KDR                                                              | 12    |
| BP       | GO:0071900 | regulation of protein serine/threonine kinase activity          | PTPRC/CD81/INSR/EGFR/VEGFA/FLT3/KIT/ABL1/ELANE/PTPN11/AKT1/FLT1/SIRT1/PDGFRB/GBA/FGFR1/SYK/PLA2G1B/ERBB2/MAP2K1            | 20    |
| CC       | GO:0031983 | vesicle lumen                                                   | ALB/EGFR/VEGFA/MPO/SERPINE1/ELANE/ARG1/TTR/PYGL/PLG/MIF/ADA/APP                                                            | 13    |
| CC       | GO:0060205 | cytoplasmic vesicle lumen                                       | ALB/VEGFA/MPO/SERPINE1/ELANE/ARG1/TTR/PYGL/PLG/MIF/ADA/APP                                                                 | 12    |
| CC       | GO:0034774 | secretory granule lumen                                         | ALB/VEGFA/MPO/SERPINE1/ELANE/ARG1/TTR/PYGL/PLG/MIF/APP                                                                     | 11    |
| CC       | GO:0045177 | apical part of cell                                             | EGFR/ABCB1/FABP1/CFTR/PDGFRB/ABCC1/SLC22A12/ABCG2/SLC10A2/ERBB2/APP                                                        | 11    |
| CC       | GO:0031091 | platelet alpha granule                                          | ALB/VEGFA/SERPINE1/PLG/SELP/APP                                                                                            | 6     |
| CC       | GO:0045121 | membrane raft                                                   | PTPRC/JAK2/INSR/EGFR/MME/KDR/ABCG2/APP/SHH                                                                                 | 9     |
| CC       | GO:0098857 | membrane microdomain                                            | PTPRC/JAK2/INSR/EGFR/MME/KDR/ABCG2/APP/SHH                                                                                 | 9     |
| CC       | GO:0031093 | platelet alpha granule lumen                                    | ALB/VEGFA/SERPINE1/PLG/APP                                                                                                 | 5     |
| CC       | GO:0016324 | apical plasma membrane                                          | EGFR/ABCB1/CFTR/PDGFRB/ABCC1/SLC22A12/ABCG2/SLC10A2/ERBB2                                                                  | 9     |
| CC       | GO:0009897 | external side of plasma membrane                                | F2/PTPRC/INSR/KIT/ABCB1/PLG/SELP/ADA/ABCG2                                                                                 | 9     |
| MF       | GO:0004713 | protein tyrosine kinase activity                                | MET/JAK2/TYK2/INSR/EGFR/FLT3/KIT/ABL1/JAK1/FLT1/PDGFRB/FGFR1/KDR/SYK/ERBB2/MAP2K1                                          | 16    |
| MF       | GO:0004714 | transmembrane receptor protein tyrosine kinase activity         | MET/INSR/EGFR/FLT3/KIT/FLT1/PDGFRB/FGFR1/KDR/ERBB2                                                                         | 10    |
| MF       | GO:0019199 | transmembrane receptor protein kinase activity                  | MET/INSR/EGFR/FLT3/KIT/FLT1/PDGFRB/FGFR1/KDR/ERBB2                                                                         | 10    |
| MF       | GO:0051427 | hormone receptor binding                                        | JAK2/TYK2/PPARG/STAT1/FLT3/NR1H4/PTPN11/JAK1/HIF1A/SIRT1/ESR1                                                              | 11    |
| MF       | GO:0043560 | insulin receptor substrate binding                              | JAK2/INSR/PIK3CA/PTPN11                                                                                                    | 4     |
| MF       | GO:0019902 | phosphatase binding                                             | MET/PPARG/EGFR/BCL2/JAK1/AKT1/PPARA/SYK/ERBB2                                                                              | 9     |
| MF       | GO:0019838 | growth factor binding                                           | INSR/EGFR/FLT3/FLT1/PDGFRB/FGFR1/KDR/ERBB2                                                                                 | 8     |
| MF       | GO:0032052 | bile acid binding                                               | NR1H4/FABP1/PYGL/PLA2G1B                                                                                                   | 4     |
| MF       | GO:0008201 | heparin binding                                                 | F2/PTPRC/VEGFA/MPO/ELANE/SELP/FGFR1/APP                                                                                    | 8     |
| MF       | GO:0005539 | glycosaminoglycan binding                                       | F2/PTPRC/VEGFA/MPO/ELANE/SELP/FGFR1/APP/SHH                                                                                | 9     |

**Supplementary Table 4. The top 20 enriched KEGG pathways.**

| ID       | Description                                            | GeneRatio | geneID                                                                                                              | Count |
|----------|--------------------------------------------------------|-----------|---------------------------------------------------------------------------------------------------------------------|-------|
| hsa01521 | EGFR tyrosine kinase inhibitor resistance              | 15/70     | MET/JAK2/EGFR/VEGFA/PIK3CA/BCL2/JAK1/AKT1/MTOR/PDGFRB/BCL2L1/KDR/BRAF/ERBB2/MAP2K1                                  | 15    |
| hsa05230 | Central carbon metabolism in cancer                    | 13/70     | MET/EGFR/FLT3/KIT/PIK3CA/AKT1/HIF1A/G6PD/MTOR/PDGFRB/FGFR1/ERBB2/MAP2K1                                             | 13    |
| hsa04151 | PI3K-Akt signaling pathway                             | 22/70     | MET/JAK2/IL2/INSR/EGFR/VEGFA/FLT3/KIT/PIK3CA/BCL2/JAK1/AKT1/MDM2/FLT1/MTOR/PDGFRB/FGFR1/BCL2L1/KDR/SYK/ERBB2/MAP2K1 | 22    |
| hsa05205 | Proteoglycans in cancer                                | 17/70     | MET/EGFR/VEGFA/PIK3CA/MMP9/PTPN11/AKT1/MDM2/HIF1A/MTOR/FGFR1/ESR1/KDR/BRAF/ERBB2/MAP2K1/SHH                         | 17    |
| hsa05215 | Prostate cancer                                        | 13/70     | EGFR/PIK3CA/MMP9/BCL2/AKT1/MDM2/MTOR/PLAT/PDGFRB/FGFR1/BRAF/ERBB2/MAP2K1                                            | 13    |
| hsa04066 | HIF-1 signaling pathway                                | 13/70     | INSR/EGFR/VEGFA/PIK3CA/SERPINE1/NOS2/BCL2/AKT1/FLT1/HIF1A/MTOR/ERBB2/MAP2K1                                         | 13    |
| hsa04014 | Ras signaling pathway                                  | 17/70     | MET/INSR/EGFR/VEGFA/FLT3/KIT/PIK3CA/ABL1/PTPN11/AKT1/FLT1/PDGFRB/FGFR1/BCL2L1/KDR/PLA2G1B/MAP2K1                    | 17    |
| hsa05212 | Pancreatic cancer                                      | 11/70     | EGFR/VEGFA/STAT1/PIK3CA/JAK1/AKT1/MTOR/BCL2L1/BRAF/ERBB2/MAP2K1                                                     | 11    |
| hsa01522 | Endocrine resistance                                   | 11/70     | EGFR/PIK3CA/MMP9/BCL2/AKT1/MDM2/MTOR/ESR1/BRAF/ERBB2/MAP2K1                                                         | 11    |
| hsa04630 | JAK-STAT signaling pathway                             | 13/70     | JAK2/TYK2/IL2/EGFR/STAT1/PIK3CA/PTPN11/BCL2/JAK1/AKT1/MTOR/PDGFRB/BCL2L1                                            | 13    |
| hsa05235 | PD-L1 expression and PD-1 checkpoint pathway in cancer | 10/70     | JAK2/EGFR/STAT1/PIK3CA/PTPN11/JAK1/AKT1/HIF1A/MTOR/MAP2K1                                                           | 10    |
| hsa05226 | Gastric cancer                                         | 12/70     | MET/EGFR/TERT/PIK3CA/ABCB1/BCL2/AKT1/MTOR/BRAF/ERBB2/MAP2K1/SHH                                                     | 12    |
| hsa05206 | MicroRNAs in cancer                                    | 16/70     | MET/EGFR/VEGFA/PIK3CA/ABL1/ABCB1/MMP9/BCL2/PTGS2/MDM2/SIRT1/MTOR/PDGFRB/ABCC1/ERBB2/MAP2K1                          | 16    |
| hsa05218 | Melanoma                                               | 9/70      | MET/EGFR/PIK3CA/AKT1/MDM2/PDGFRB/FGFR1/BRAF/MAP2K1                                                                  | 9     |
| hsa04015 | Rap1 signaling pathway                                 | 13/70     | MET/INSR/EGFR/VEGFA/KIT/PIK3CA/AKT1/FLT1/PDGFRB/FGFR1/KDR/BRAF/MAP2K1                                               | 13    |
| hsa04072 | Phospholipase D signaling pathway                      | 11/70     | F2/INSR/EGFR/KIT/PIK3CA/PTPN11/AKT1/MTOR/PDGFRB/SYK/MAP2K1                                                          | 11    |
| hsa05219 | Bladder cancer                                         | 7/70      | EGFR/VEGFA/MMP9/MDM2/BRAF/ERBB2/MAP2K1                                                                              | 7     |
| hsa05167 | Kaposi sarcoma-associated herpesvirus infection        | 12/70     | JAK2/TYK2/VEGFA/STAT1/PIK3CA/PTGS2/JAK1/AKT1/HIF1A/MTOR/SYK/MAP2K1                                                  | 12    |
| hsa05160 | Hepatitis C                                            | 11/70     | CD81/TYK2/EGFR/STAT1/PIK3CA/JAK1/AKT1/PARA/NR1H3/BRAF/MAP2K1                                                        | 11    |

**Supplementary Table 5. Volatile components in ESC.**

| No. | Name                                                       | MW     | Results  |
|-----|------------------------------------------------------------|--------|----------|
| 1   | 3-methyl-cyclopentanol                                     | 100.16 | Accepted |
| 2   | 4-hydroxy-4-methyl-2-pentanone                             | 116.16 | Accepted |
| 3   | (Z) -3-hexen-1-ol                                          | 299.99 | Accepted |
| 4   | ethyl benzene                                              | 106.17 | Accepted |
| 5   | 2,4-Hexadienal                                             | 96.13  | Accepted |
| 6   | 1-methylethyl-benzene                                      | 120.19 | Accepted |
| 7   | 1-octen-3-ol                                               | 128.21 | Accepted |
| 8   | pentanoic acid                                             | 102.13 | Accepted |
| 9   | octyl aldehyde                                             | 128.21 | Accepted |
| 10  | (2E,4E,6E)-octa-2,4,6-trienal                              | 122.16 | Accepted |
| 11  | Phenylacetaldehyde                                         | 120.15 | Accepted |
| 12  | (-)-Linalool                                               | 145.25 | Accepted |
| 13  | nonyl aldehyde                                             | 142.24 | Accepted |
| 14  | L- $\alpha$ -terpineol                                     | 154.25 | Accepted |
| 15  | decanal                                                    | 156.26 | Accepted |
| 16  | Bicyclo[5.2.0]non-1-ene                                    | 122.21 | Accepted |
| 17  | 3-Ethyl-4-methyl-1H-pyrrole-2,5-dione                      | 139.15 | Accepted |
| 18  | Cyclohexane                                                | 124.22 | Accepted |
| 19  | geraniol                                                   | 154.25 | Accepted |
| 20  | swertiol                                                   | 154.21 | Accepted |
| 21  | 1-nonanol                                                  | 144.25 | Accepted |
| 22  | 3,3,6-trimethyl-1,5-heptadien-4-one                        | 152.23 | Accepted |
| 23  | Bicycle[3.2.1]octan-3-one                                  | 124.18 | Accepted |
| 24  | (Z) -2-pentadecen-4-yne                                    | 206.37 | Accepted |
| 25  | (Z) -9-hydroxy-4-methyl-7-nonenoic acid lactone            | 168.23 | Accepted |
| 26  | 1-undecyne                                                 | 152.28 | Accepted |
| 27  | 4-vinyl-2-methoxy-phenol                                   | 150.17 | Accepted |
| 28  | (E, E) -2,4-decadienal                                     | 152.23 | Accepted |
|     | 2,3-dihydro-4H-1-benzopyran-4-one                          | 148.16 | Accepted |
| 29  | 1,2-dimethyl-1,5-cyclooctadiene                            | 136.23 | Accepted |
| 30  | 2-methoxy-4-(2-propenyl)-phenol                            | 164.20 | Accepted |
| 31  | nerolic acid                                               | 162.18 | Accepted |
| 32  | 1-dodecanol                                                | 186.33 | Accepted |
| 33  | cyanic acid-2,4-dimethylphenyl ester                       | 147.17 | Accepted |
| 34  | (E) -6,10-dimethyl-5,9-undecadien-2-one                    | 194.31 | Accepted |
| 35  | (E) -2-methoxy-4-(1-propenyl)-phenol                       | 164.20 | Accepted |
| 36  | 2-methyl-decane                                            | 156.31 | Accepted |
| 37  | 1,3,5,7-tetramethyl-adamantane                             | 192.34 | Accepted |
| 38  | 2-methyl-5-(1,1,5-trimethyl-5-hexenyl)-furan               | 206.32 | Accepted |
| 39  | pentadecane                                                | 212.41 | Accepted |
| 40  | 3-decen-5-one                                              | 154.25 | Accepted |
| 41  | cis-hexahydro-8a-methyl-1,8(2H,5H)-naphthalenedione        | 180.24 | Accepted |
| 42  | benzoic acid-4-ethoxy ethyl ester                          | 194.23 | Accepted |
| 43  | 5,6,7,7a-tetrahydro-4,4,7a-trimethyl-2(4H)-benzofuranone   | 180.24 | Accepted |
| 44  | octadecane                                                 | 254.49 | Accepted |
| 45  | cedryl propyl ether                                        | 264.44 | Accepted |
| 46  | 2-(acetyloxy)-1,4-benzene-dicarboxylic acid-dimethyl ester | 252.22 | Accepted |
| 47  | 3,4-dihydro-1-oxo-1H-2-benzopyran-5-carboxaldehyde         | 176.17 | Accepted |

|    |                                                                    |        |          |
|----|--------------------------------------------------------------------|--------|----------|
| 48 | tetradecanal                                                       | 212.37 | Accepted |
| 49 | heneicosane                                                        | 296.57 | Accepted |
| 50 | ( Z ) -10-methyl-11-tetradecen-1-ol propionate                     | 282.46 | Accepted |
| 51 | isopropyl myristate                                                | 270.45 | Accepted |
| 52 | 5,9,13-trimethyl-4,8,12-tetradecatrienal                           | 248.40 | Accepted |
| 53 | 6,10,14-trimethyl-2-pentadecanone                                  | 268.48 | Accepted |
| 54 | tetrakis( 1-methylethylidene )-cyclobutane                         | 192.34 | Accepted |
| 55 | dibutyl phthalate                                                  | 278.34 | Accepted |
| 56 | nonadecane                                                         | 268.52 | Accepted |
| 57 | 1,2-benzene-dicarboxylic acid-butyl-8-methylnonyl ester            | 362.50 | Accepted |
| 58 | [(E,E) -3,7,11-trimethyl-2,6,10-dodecatrien-1-yl]esterbenzoic acid | 326.47 | Accepted |
| 59 | methyl 13-methyltetradecanoate                                     | 256.42 | Accepted |
| 60 | ester with butyl Glycolate-butylester-phthalic acid                | 336.38 | Accepted |
| 61 | hexadecanoic acid-ethyl ester                                      | 284.48 | Accepted |
| 62 | eicosane                                                           | 282.55 | Accepted |
| 63 | docosane                                                           | 310.60 | Accepted |
| 64 | pentacosane                                                        | 352.68 | Accepted |
| 65 | phytol isomer                                                      | 296.53 | Accepted |
| 66 | (E,E,Z) -1,3,12-nonadecatriene-5,14-diol                           | 294.47 | Accepted |
| 67 | trans-2-nonadecene                                                 | 266.50 | Accepted |
| 68 | hexacosane                                                         | 366.70 | Accepted |
| 69 | tricosane                                                          | 324.63 | Accepted |
| 70 | 1-dotriacontanol                                                   | 466.86 | Accepted |
| 71 | ( Z ) -14-tricosenyl formate                                       | 366.62 | Accepted |
| 72 | pentatriacontane                                                   | 492.94 | Accepted |
| 73 | phthalic acid-diisooctyl ester                                     | 390.55 | Accepted |
